# Supplementary material for: An organic–inorganic hybrid semiconductor material based on Lindqvist polyoxomolybdate and a tetra-nuclear copper complex containing two different ligands
Source: Royal Society of Chemistry journal article supplement (doi:10.1039/c3dt53345j), 2014-01-01
Supplement: c3dt53345j1.pdf [file c3dt53345j1.pdf]

*Supporting information*

**An organic-inorganic hybrid semiconductor material based on lindqvist polyoxomolybdate and tetra-nuclear copper complex containing two different ligands**

Zhi-Kun Qu,<sup>a</sup> Kai Yu,<sup>\*a,b</sup> Zhi-Feng Zhao,<sup>a,b</sup> Zhan-hua Su,<sup>a,b</sup> Jing-Quan Sha,<sup>c</sup> Chun-Mei Wang,<sup>a,b</sup>

Bai-Bin Zhou,<sup>\*a,b</sup>

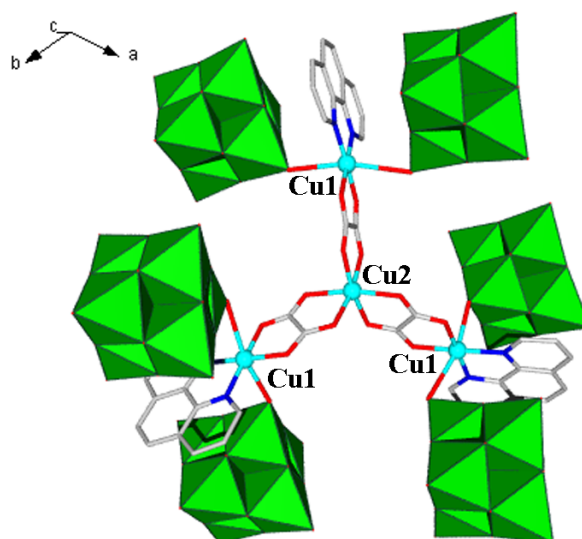

**FigureS1** The coordination environment of hexad-connected tetranuclear copper(II) complexes unit

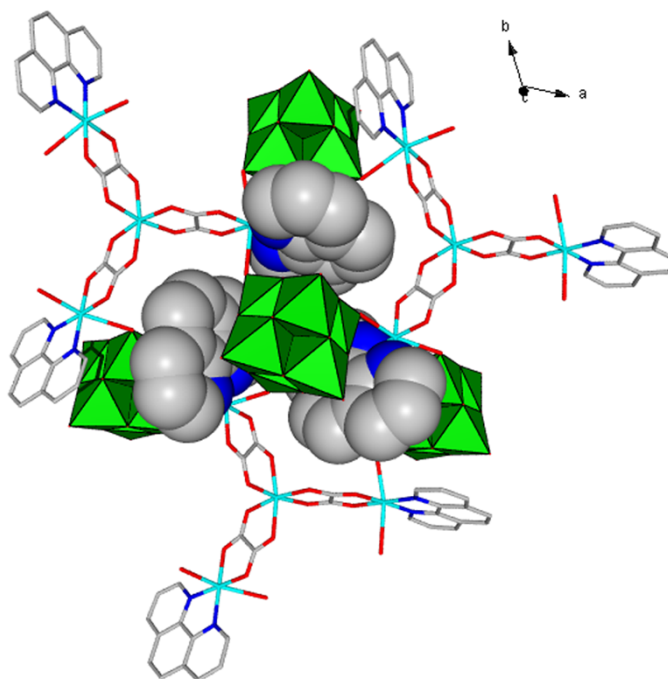

**FigureS2** The apertures of the open network are filled by barrier-liked phen

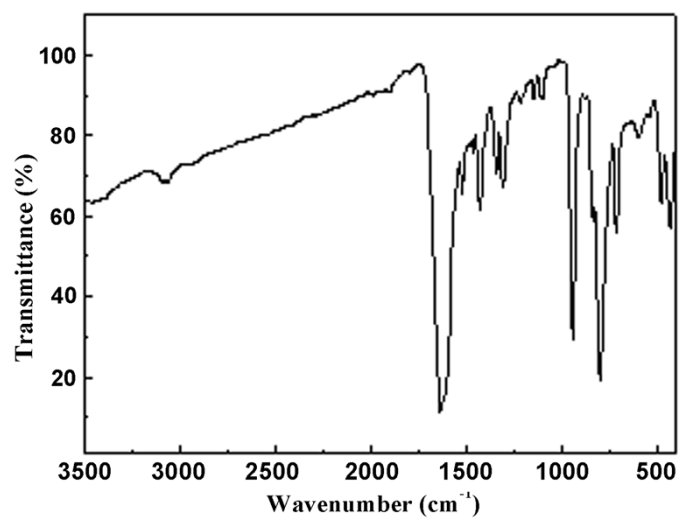

Fig. S3 IR spectra of compound 1.

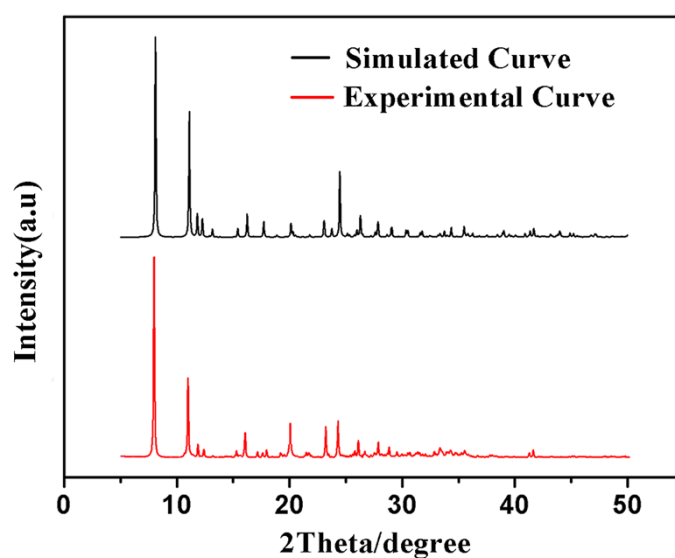

Fig. S4 The PXRD contrast curves of 1

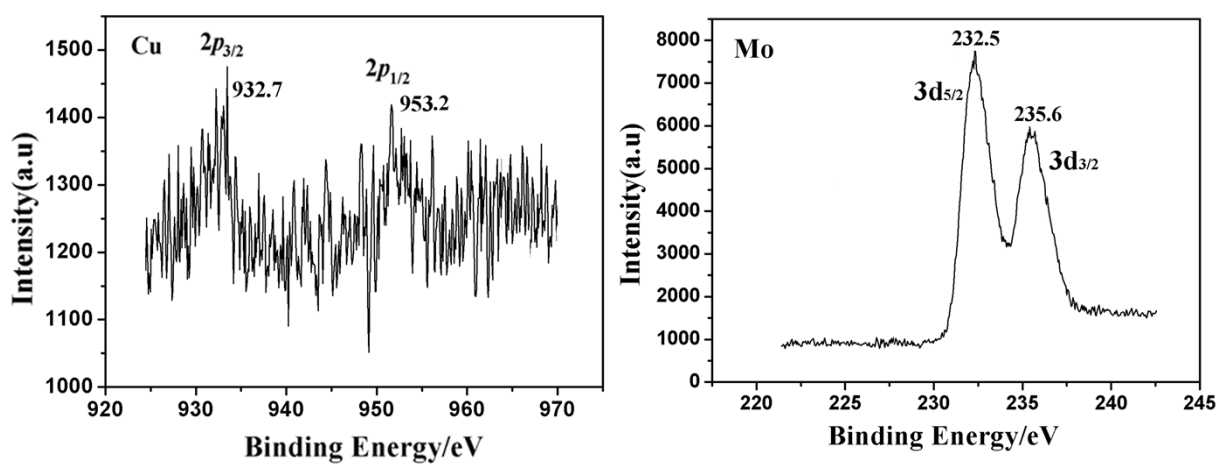

Fig. S5 The XPS spectra of  $\text{Cu}^{2+}$  and  $\text{Mo}^{6+}$ .

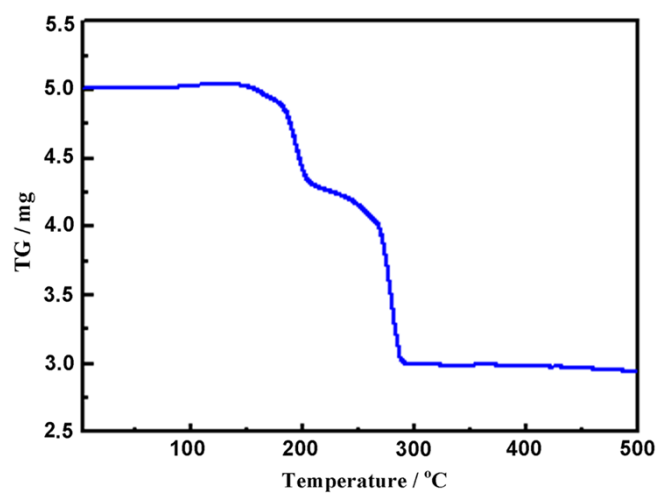

**Fig. S6** The TG curve of compound **1**.

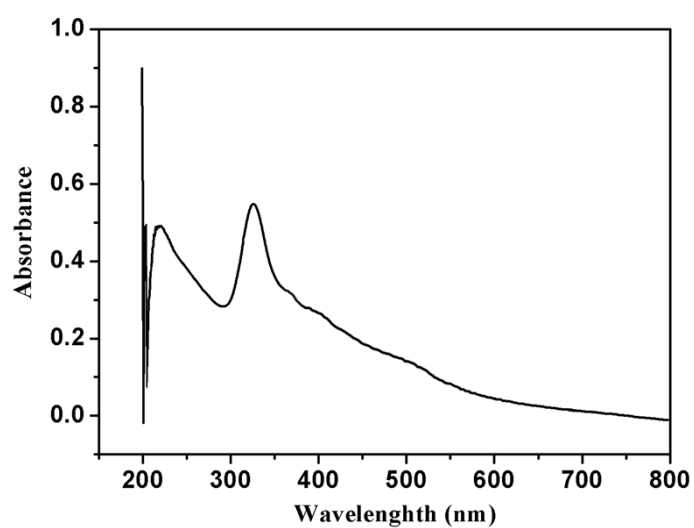

**Fig. S7** The UV-vis-NIR absorption spectrum of compound **1**.

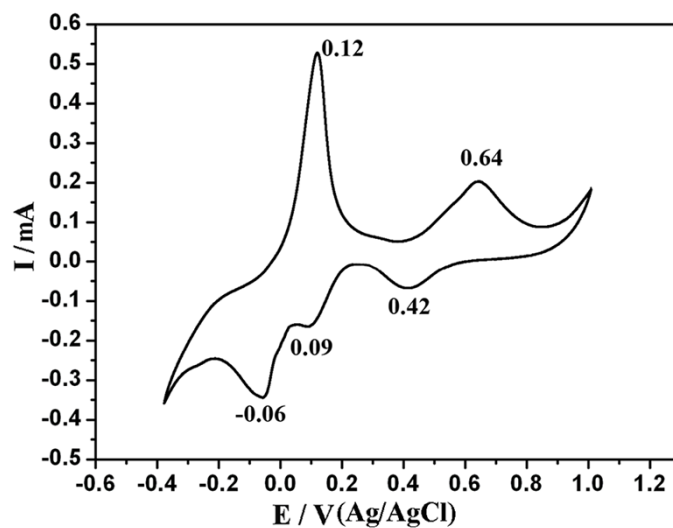

**Figure S8** The cyclic voltammograms of the **1**-CPE in 1 M H<sub>2</sub>SO<sub>4</sub> at 20 mV · s<sup>-1</sup> scan rates

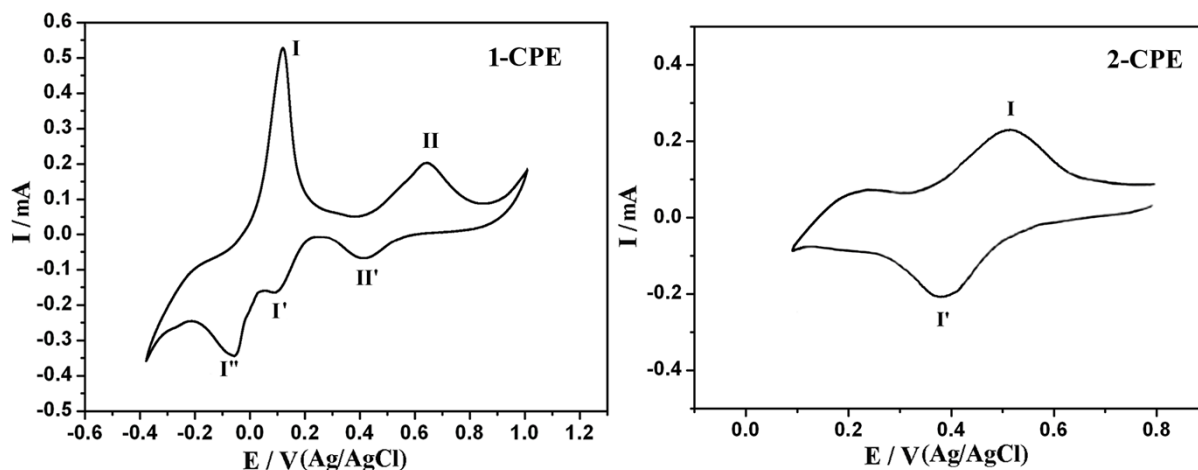

**Figure S9** The cyclic voltammograms of (a) the 1-CPE and (b) the 2-CPE ( $[\text{Mo}_6\text{O}_{19}][\text{N}(\text{C}_4\text{H}_9)_2]_2$  (**2**)) in 1 M  $\text{H}_2\text{SO}_4$  at  $20 \text{ mV} \cdot \text{s}^{-1}$  scan rates

**Table S1** Selected bond lengths (Å) and angles ( $^\circ$ ) of **1**

|                      |            |                       |             |                       |            |
|----------------------|------------|-----------------------|-------------|-----------------------|------------|
| Mo(1)-O(4)           | 1.692(2)   | Mo(1)-O(2)            | 1.884(2)    | Mo(1)-O(3)            | 1.885(2)   |
| Mo(1)-O(2)#1         | 1.969(2)   | Mo(1)-O(3)#2          | 1.970(2)    | Mo(1)-O(1)            | 2.3221(3)  |
| Mo(2)-O(6)           | 1.681(3)   | Mo(2)-O(5)            | 1.9138(18)  | Mo(2)-O(8)            | 1.915(3)   |
| Mo(2)-O(7)           | 1.9216(18) | Mo(2)-O(8)#3          | 1.935(3)    | Mo(2)-O(9)            | 2.3128(3)  |
| Cu(1)-O(10)          | 1.952(2)   | Cu(1)-O(11)           | 1.957(2)    | Cu(1)-N(1)            | 1.967(3)   |
| Cu(1)-N(2)           | 1.981(3)   | Cu(1)-O(4)            | 2.495(2)    | Cu(1)-O(6)            | 2.667(3)   |
| Cu(2)-O(12)          | 2.080(2)   | Cu(2)-O(12)#4         | 2.080(2)    | Cu(2)-O(12)#5         | 2.080(2)   |
| Cu(2)-O(13)#4        | 2.080(2)   | Cu(2)-O(13)           | 2.080(2)    | Cu(2)-O(13)#5         | 2.080(2)   |
| O(1)-Mo(1)#6         | 2.3220(3)  | O(1)-Mo(1)#7          | 2.3220(3)   | O(1)-Mo(1)#2          | 2.3221(3)  |
| O(1)-Mo(1)#1         | 2.3222(3)  | O(1)-Mo(1)#8          | 2.3222(3)   | O(9)-Mo(2)#3          | 2.3127(3)  |
| O(9)-Mo(2)#11        | 2.3128(3)  | O(9)-Mo(2)#9          | 2.3131(3)   | O(9)-Mo(2)#10         | 2.3131(3)  |
| O(9)-Mo(2)#12        | 2.3132(3)  | Mo(5)-O(2)            | 2.266(6)    | Mo(6)-O(2)            | 2.307(6)   |
| O(4)-Mo(1)-O(2)      | 105.07(11) | O(4)-Mo(1)-O(3)       | 104.82(11)  | O(4)-Mo(1)-O(2)#1     | 102.00(10) |
| O(4)-Mo(1)-O(3)#2    | 101.74(11) | O(4)-Mo(1)-O(1)       | 176.73(8)   | O(6)-Mo(2)-O(5)       | 101.88(15) |
| O(6)-Mo(2)-O(8)      | 104.69(15) | O(6)-Mo(2)-O(7)       | 104.59(15)  | O(6)-Mo(2)-O(8)#3     | 102.18(14) |
| O(6)-Mo(2)-O(9)      | 177.95(12) | O(10)-Cu(1)-O(11)     | 85.42(9)    | O(10)-Cu(1)-N(1)      | 179.26(11) |
| O(10)-Cu(1)-N(2)     | 96.86(10)  | O(10)-Cu(1)-O(4)      | 89.76(9)    | O(10)-Cu(1)-O(6)      | 86.60(11)  |
| O(12)-Cu(2)-O(12)#4  | 90.30(9)   | O(12)-Cu(2)-O(12)#5   | 90.30(9)    | O(12)-Cu(2)-O(13)#4   | 169.29(9)  |
| O(12)-Cu(2)-O(13)    | 81.13(9)   | O(12)-Cu(2)-O(13)#5   | 96.13(9)    | Mo(1)#6-O(1)-Mo(1)#7  | 90.180(10) |
| Mo(1)#6-O(1)-Mo(1)#2 | 90.179(10) | Mo(1)#6-O(1)-Mo(1)    | 89.823(10)  | Mo(1)#6-O(1)-Mo(1)#1  | 179.995(1) |
| Mo(1)#6-O(1)-Mo(1)#8 | 89.825(10) | Mo(2)#3-O(9)-Mo(2)    | 90.303(13)  | Mo(2)#3-O(9)-Mo(2)#11 | 90.302(13) |
| Mo(2)#3-O(9)-Mo(2)#9 | 89.781(17) | Mo(2)#3-O(9)-Mo(2)#10 | 179.893(16) | Mo(2)#3-O(9)-Mo(2)#12 | 89.632(18) |
